# Supplementary material for: Selenium supplementation has beneficial and detrimental effects on immunity to influenza vaccine in older adults
Source: PubMed Central journal article supplement — Clin Nutr. 2017 Apr;36(2):407–15. doi: 10.1016/j.clnu.2015.12.003 (PMC5381341; doi:10.1016/j.clnu.2015.12.003), 2017-04
Supplement: mmc1.pdf [file mmc1.pdf]

## Online Supporting Material

**Supplementary Table 1:** Phenotypic definition of Large Granular Lymphocyte subsets in blood

| Cell types and Subtypes                    | Abbreviations | Phenotype        |
|--------------------------------------------|---------------|------------------|
| Pre-Natural Killer cells (precursor)       | pre-NK        | CD56+ CD16-      |
| Natural Killer cells (total excluding LAK) | NK            | CD16+            |
| Lymphokine Activated Killer cells          | LAK           | CD16+ CD56-      |
| Natural Killer CD8 cells                   | CD8-NK        | CD8+ CD16+ CD56+ |
| Natural Killer T cells                     | NKT           | CD3+ CD56+       |
| T-large granular lymphocytes               | T-LGL         | CD3+ CD8+ CD16+  |
| Cytotoxic T cells (total)                  | Tctx          | CD3+ CD8+        |
| Cytotoxic T cells- ADCC                    | Tctx-ADCC     | CD3+ CD16+ CD8-  |
