# Supplementary material for: Selenium supplementation has beneficial and detrimental effects on immunity to influenza vaccine in older adults
Source: PubMed Central journal article supplement — Clin Nutr. 2017 Apr;36(2):407–15. doi: 10.1016/j.clnu.2015.12.003 (PMC5381341; doi:10.1016/j.clnu.2015.12.003), 2017-04
Supplement: mmc2.pdf [file mmc2.pdf]

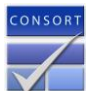

## CONSORT 2010 checklist of information to include when reporting a randomised trial\*

| Section/Topic                    | Item No | Checklist item                                                                                                                                                                              | Reported on page No                |
|----------------------------------|---------|---------------------------------------------------------------------------------------------------------------------------------------------------------------------------------------------|------------------------------------|
| <b>Title and abstract</b>        |         |                                                                                                                                                                                             |                                    |
|                                  | 1a      | Identification as a randomised trial in the title                                                                                                                                           | 2                                  |
|                                  | 1b      | Structured summary of trial design, methods, results, and conclusions (for specific guidance see CONSORT for abstracts)                                                                     | 2, 3                               |
| <b>Introduction</b>              |         |                                                                                                                                                                                             |                                    |
| Background and objectives        | 2a      | Scientific background and explanation of rationale                                                                                                                                          | 4, 5                               |
|                                  | 2b      | Specific objectives or hypotheses                                                                                                                                                           | 2, 5                               |
| <b>Methods</b>                   |         |                                                                                                                                                                                             |                                    |
| Trial design                     | 3a      | Description of trial design (such as parallel, factorial) including allocation ratio                                                                                                        | 6, 7 Ref.7                         |
|                                  | 3b      | Important changes to methods after trial commencement (such as eligibility criteria), with reasons                                                                                          | none                               |
| Participants                     | 4a      | Eligibility criteria for participants                                                                                                                                                       | 6, 7, Ref.7                        |
|                                  | 4b      | Settings and locations where the data were collected                                                                                                                                        | Ref.7                              |
| Interventions                    | 5       | The interventions for each group with sufficient details to allow replication, including how and when they were actually administered                                                       | 6, 7, Ref.7                        |
| Outcomes                         | 6a      | Completely defined pre-specified primary and secondary outcome measures, including how and when they were assessed                                                                          | 11, ClinicalTrials.gov NCT00279812 |
|                                  | 6b      | Any changes to trial outcomes after the trial commenced, with reasons                                                                                                                       | None                               |
| Sample size                      | 7a      | How sample size was determined                                                                                                                                                              | 11,12                              |
|                                  | 7b      | When applicable, explanation of any interim analyses and stopping guidelines                                                                                                                | N/A                                |
| <b>Randomisation:</b>            |         |                                                                                                                                                                                             |                                    |
| Sequence generation              | 8a      | Method used to generate the random allocation sequence                                                                                                                                      |                                    |
|                                  | 8b      | Type of randomisation; details of any restriction (such as blocking and block size)                                                                                                         | Ref.7                              |
| Allocation concealment mechanism | 9       | Mechanism used to implement the random allocation sequence (such as sequentially numbered containers), describing any steps taken to conceal the sequence until interventions were assigned | 7, Ref.7                           |
| Implementation                   | 10      | Who generated the random allocation sequence, who enrolled participants, and who assigned participants to interventions                                                                     | 7,8                                |

## Online Supporting Material: Table 2

|                                                      |     |                                                                                                                                                   |                     |
|------------------------------------------------------|-----|---------------------------------------------------------------------------------------------------------------------------------------------------|---------------------|
| Blinding                                             | 11a | If done, who was blinded after assignment to interventions (for example, participants, care providers, those assessing outcomes) and how          | 8                   |
|                                                      | 11b | If relevant, description of the similarity of interventions                                                                                       | 4                   |
| Statistical methods                                  | 12a | Statistical methods used to compare groups for primary and secondary outcomes                                                                     | 11, 12, Ref.7       |
|                                                      | 12b | Methods for additional analyses, such as subgroup analyses and adjusted analyses                                                                  | 11,12               |
| <b>Results</b>                                       |     |                                                                                                                                                   |                     |
| Participant flow (a diagram is strongly recommended) | 13a | For each group, the numbers of participants who were randomly assigned, received intended treatment, and were analysed for the primary outcome    | 13, Figure 1, Ref.7 |
|                                                      | 13b | For each group, losses and exclusions after randomisation, together with reasons                                                                  | 13, Figure1, Ref.7  |
| Recruitment                                          | 14a | Dates defining the periods of recruitment and follow-up                                                                                           | Ref.7               |
|                                                      | 14b | Why the trial ended or was stopped                                                                                                                | 2                   |
| Baseline data                                        | 15  | A table showing baseline demographic and clinical characteristics for each group                                                                  | Table 1, Ref.7      |
| Numbers analysed                                     | 16  | For each group, number of participants (denominator) included in each analysis and whether the analysis was by original assigned groups           | Figure 1, Ref.7     |
| Outcomes and estimation                              | 17a | For each primary and secondary outcome, results for each group, and the estimated effect size and its precision (such as 95% confidence interval) | Ref.7               |
|                                                      | 17b | For binary outcomes, presentation of both absolute and relative effect sizes is recommended                                                       | 13-16               |
| Ancillary analyses                                   | 18  | Results of any other analyses performed, including subgroup analyses and adjusted analyses, distinguishing pre-specified from exploratory         | N/A                 |
| Harms                                                | 19  | All important harms or unintended effects in each group (for specific guidance see CONSORT for harms)                                             | 13, Figure 1        |
| <b>Discussion</b>                                    |     |                                                                                                                                                   |                     |
| Limitations                                          | 20  | Trial limitations, addressing sources of potential bias, imprecision, and, if relevant, multiplicity of analyses                                  | 2, 20,21            |
| Generalisability                                     | 21  | Generalisability (external validity, applicability) of the trial findings                                                                         | 3, 20, 21           |
| Interpretation                                       | 22  | Interpretation consistent with results, balancing benefits and harms, and considering other relevant evidence                                     | 17-21               |
| <b>Other information</b>                             |     |                                                                                                                                                   |                     |
| Registration                                         | 23  | Registration number and name of trial registry                                                                                                    | 2                   |
| Protocol                                             | 24  | Where the full trial protocol can be accessed, if available                                                                                       | Ref.7               |
| Funding                                              | 25  | Sources of funding and other support (such as supply of drugs), role of funders                                                                   | 21                  |
